# Supplementary material
Source: publisher figshare collection journal article supplement (https://acs.figshare.com/ndownloader/files/4116406)
Supplement: Supplementary file 1 [file 4116406]

## Sheet: Normal AA code
Motif	MotifX Score	Foreground Matches	Foreground Size	Background Matches	Background Size	Fold Increase			Criteria
......pSD.E...	32	83	1199	1255	257984	14.23	ALL_S		normal AA code
...L..pSN.....	28.76	47	759	2136	236918	6.87	ALL_S		background: PFAL 7.0
......pSP.K...	27.12	23	546	451	225360	21.05	ALL_S		p=0.0001 (ST); p=0.001 (Y)
......pS.TE..V	26.84	11	980	76	253633	37.46	ALL_S		n > 5 (foreground matches)
...S..pS.R..K.	25.43	7	987	53	253686	33.95	ALL_S		fold increase >2
...KR.pS......	24.89	24	570	1023	226383	9.32	ALL_S
.I.K..pS......	24.59	24	143	1995	156559	13.17	ALL_S
......pSE.E...	23.94	42	1116	1227	256729	7.87	ALL_S
.L.K..pS......	23.85	22	101	1723	151317	19.13	ALL_S
R..S..pS......	23.63	24	1046	728	255070	8.04	ALL_S
..SR..pS......	22.18	16	898	480	250610	9.3	ALL_S
...R..pS....R.	21.1	15	712	221	234782	22.38	ALL_S
...RS.pS......	21.03	35	1022	656	254342	13.28	ALL_S
...R..pS.D....	20.79	28	1074	432	255502	15.42	ALL_S
K..pS..S......	20.79	27	597	1738	228121	5.94	ALL_S
.KS…pS......	20.47	25	697	1593	234561	5.28	ALL_S
...RR.pS......	20.44	22	949	392	252822	14.95	ALL_S
...L..pS.E....	20.2	14	273	836	181627	11.14	ALL_S
..KS..pS......	20.14	29	927	1820	252430	4.34	ALL_S
.....DpS..E...	20.07	20	969	735	253557	7.12	ALL_S
....K.pSL.....	16.95	9	27	1232	128588	34.79	ALL_S
......pS..E...	16	123	882	13212	250130	2.64	ALL_S
...R..pS......	16	75	672	4847	232968	5.36	ALL_S
..T…pS......	16	64	419	9161	205853	3.43	ALL_S
..S…pS......	16	82	355	15065	196692	3.02	ALL_S
...S..pS......	16	61	259	11374	180791	3.74	ALL_S
...L..pS......	16	55	198	12858	169417	3.66	ALL_S
......pS...S..	15.48	104	523	19056	224909	2.35	ALL_S
......pTD.E...	14.61	13	289	563	162980	13.02	ALL_T
....R.pS......	10.11	18	119	3247	154564	7.2	ALL_S
......pSP.....	9.82	15	79	3228	149594	8.8	ALL_S
....D.pS......	9.72	18	45	9154	137742	6.02	ALL_S
...R..pT......	9.26	31	320	4338	167318	3.74	ALL_T
....E.pS......	8.55	19	64	8624	146366	5.04	ALL_S
......pTE..E..	8.21	8	148	525	128166	13.2	ALL_T
....S.pT......	7.33	43	276	10250	162417	2.47	ALL_T
......pTP.....	6.81	24	233	4498	152167	3.48	ALL_T
......pYS.....	5.77	15	59	14000	230922	4.19	ALL-Y
....K.pS......	5.4	10	18	13679	127356	5.17	ALL_S
......pT.D....	5.36	32	209	9441	147669	2.39	ALL_T
.....SpT......	4.46	29	177	10062	138228	2.25	ALL_T
......pY.S....	4.12	11	44	13830	216922	3.92	ALL-Y

## Sheet: Degenerate AA code
Motif (degenerated)	Motif (normal)	MotifX Score	Foreground Matches	Foreground Size	Background Matches	Background Size	Fold Increase		Criteria
......pSDDD..K	......[pS/pT][D/E][D/E][D/E]..[K/R]	52.17	32	2376	292	418495	19.3		degenerate AA code: A=AG; D=DE; F=FY; K=KR; I=ILMV; Q=Q,N; S= ST; C=C; H=H; P=P; W=W
...K..pSDDD...	...[K/R]..[pS/pT][D/E][D/E][D/E]...	41.2	19	2344	184	418203	18.42		background: PFAL 7.0 degeneated code
......pSD.DK..	......[pS/pT][D/E].[D/E][K/R]..	36.82	38	1967	799	401418	9.71		p=0.0001 (ST); p=0.001 (Y)
..K…pSD.D...	..[K/R]…[pS/pT][D/E].[D/E]...	36.7	44	2138	829	408692	10.15		n > 5 (foreground matches)
...K..pS.SA...	...[K/R]..[pS/pT].[S/T][A/G]...	36.11	17	2094	294	407863	11.26		fold increase >2
......pSQDI...	......[pS/T][Q/N][D/E]I...	29.98	39	2177	1793	410485	4.1
......pSD.D...	......[pS/T][D/E].[D/E]...	29.36	78	1832	4209	394350	3.99
...K..pS.D....	...[K/R]..[pS/pT].[D/E]....	28.74	148	2325	7534	418019	3.53
...K..pS.S....	...[K/R]..[pS/pT].[S/T]....	27.84	110	2077	6151	407569	3.51
K.....pS.D....	[K/R].....[pS/pT].[D/E]....	27.82	97	1929	6269	400619	3.21
..K…pS.DD...	..[K/R]...[pS/pT].[D/E][D/E]...	27.65	25	1548	827	372393	7.27
...KS.pS......	...[K/R][pS/pT].[S/T]......	27.32	74	1622	4335	376728	3.96
......pSP.K...	......[pS/pT]P.[K/R]...	27.03	40	1456	1069	366300	9.41
......pSQ.I...	......[pS/pT][Q/N].I...	21.94	132	1754	13413	390141	2.19
...D..pSD.....	...[D/E]..[pS/pT][D/E].....	21.85	67	1523	5266	371566	3.1
..K…pSD.....	..[K/R]...[pS/pT][D/E].....	17.8	47	1416	4079	365231	2.97
...K..pS.Q....	...[K/R]..[pS/pT].[Q/N]....	17.53	73	1369	7417	361152	2.6
.....KpS.S....	.....[K/R][pS/pT].[S/T]....	14.27	37	624	3678	232890	3.75
K.....pS..Q...	[K/R].....[pS/pT]..[Q/N]...	9.4	24	304	3146	158095	3.97
......pSP.....	......[pS/pT]P.....	9.08	60	815	8136	266273	2.41
......Y.pS..D.	......pY.[S/T]..[D/E].	6.89	8	59	3192	229977	9.77
...A..pS......	...[A/G]..[pS/pT]......	4.75	38	280	10128	154949	2.08
......pYS.....	......pY[S/T].....	4.05	15	51	22574	226785	2.95

## Sheet: merged table
ID	BEST MOTIF	motif count	MATCHED MOTIF	MATCHED MOTIF count
1	...[K/R]..[pS/pT].[D/E]....	148	novel; PKA extended	425
2	......[pS/pT][Q/N].[I/L/V/M]...	114	novel	524
3	...[K/R]..[pS/pT].[S/T]....	108	novel; PKA extended	425
4	[K/R].....[pS/pT].[D/E]....	94	novel	524
5	......pS..E...	86	CK2	168
6	......pS[D/E].[D/E]...	78	CK2	168
7	...[K/R][S/T].[pS/pT]......	74	novel; PKA extended	425
8	......pS...S..	71	GSK3	71
9	...[D/E]..[pS/pT][D/E].....	67	novel	524
10	...[K/R]..[pS/pT].[Q/N]....	57	novel; PKA extended	425
11	..S…pS......	54	CK1	144
12	...S..pS......	50	CK1	144
13	...L..pS......	45	NEK6	45
14	..[K/R]...[pS/pT][D/E].[D/E]...	44	novel	524
15	......[pS/pT]P.....	44	novel	524
16	...L..pSN.....	43	novel, NEK6-extended	53
17	......[pS/pT]P.[K/R]…	40	CDK2	40
18	..T…pS......	40	CK1	144
19	......[pS/pT][D/E].[D/E][K/R]..	38	novel; CK2 extended	77
20	..[K/R]...[pS/pT][D/E].....	38	novel; PKA extended	425
21	......[pS/pT][D/E][D/E][D/E]..[K/R]	32	novel; CK2 extended	77
22	....S.pT......	31	novel	524
23	...R..pS......	27	CAMk2	37
24	..KS..pS......	26	novel; CK1 extended	103
25	..[K/R]...[pS/pT].[D/E][D/E]...	25	novel; CK1 &CK2 merged	44
26	.....SpT......	23	novel	524
27	.....[K/R][pS/pT].[S/T]....	21	novel	524
28	.[I/L/V].K..pS......	21	PKD	21
29	K..S..pS......	20	novel; CK1 extended	103
30	...[K/R]..[pS/pT][D/E][D/E][D/E]...	19	novel; CK1 &CK2 merged	44
31	...[A/G]..[pS/pT]......	18	novel	524
32	R..S..pS......	18	novel; CK1 extended	103
33	.....DpS..E...	17	CK2-like	17
34	...[K/R]..[pS/pT].[S/T][A/G]...	17	novel; CK1 extended	103
35	......pYS.....	15	Src kinase	15
36	....D.pS......	15	PKC	29
37	.KS…pS......	15	novel; CK1 extended	103
38	....E.pS......	14	PKC	29
39	....R.pS......	12	PKA	34
40	...RR.pS......	12	PKA	34
41	...R..pS....R.	11	novel, CAMK2 extended	19
42	......pT.D....	10	novel	524
43	...KR.pS......	10	PKA	34
44	...L..pS.E....	10	novel, NEK6-extended	53
45	...R..pT......	10	CAMK2	37
46	......pY.[S/T]..[D/E].	8	novel	524
47	..SR..pS......	8	novel, CAMK2 extended	19
48	[K/R].....[pS/pT]..[Q/N]...	7	novel	524
49	......pS.TE..V	7	novel; CK2 extended	77
50	...S..pS.R..K.	7	novel; CK1 extended	103
51	....K.pS......	6	Aurora	12
52	....K.pSL.....	6	Aurora	12
53	......pY.S....	4	novel	524
54	......pSD.E...	4	CK2	168
